# Supplementary material for: Natural hybridization in heliconiine butterflies: the species boundary as a continuum
Source: Springer Nature journal article supplement (doi:10.1186/1471-2148-7-28), 2007-01-01
Supplement: 12862_2006_322_MOESM3_ESM.pdf [file 12862_2006_322_MOESM3_ESM.pdf]

*C. Eueides* species

|          |         |      |      |      |      |      |      |      |
|----------|---------|------|------|------|------|------|------|------|
| procula  | 0.84    |      |      |      |      |      |      |      |
| vibilia  | 4.99    | 0.32 |      |      |      |      |      |      |
| pavana   | x       | 2.87 | x    |      |      |      |      |      |
| isabella | 4.19    | 4.09 | 3.73 | 0.13 |      |      |      |      |
| lineata  | 5.35    | 6.73 | x    | 6.12 | x    |      |      |      |
| aliphera | 5.54    | 6.47 | 6.09 | 5.80 | 6.86 | 0.13 |      |      |
| lybia    | 6.76    | 7.15 | 6.70 | 6.47 | 7.44 | 5.94 | 1.93 |      |
| tales    | x       | 8.26 | x    | 7.90 | x    | 6.77 | 7.25 | 2.17 |
|          | proc    | vib  | pav  | isa  | lin  | ali  | lyb  | tal  |
|          | Eueides |      |      |      |      |      |      |      |
